# Supplementary material
Source: MDPI journal article supplement (https://www.mdpi.com/2071-1050/11/22/6264)
Supplement: s1 [file s1]

## Supplementary Material

Table S below outlines the questions in the survey that served to construct the separate indices of 'Product knowledge', 'Perceived benefit', and 'Perceived risk' in relation to remanufactured auto parts. The combination of these indices, also referred to as elements in our analysis, produced the 'Purchase Intention' index, as described in section 3. Methodology of the article.

**Table S.** Questions for measuring perceptions.

| <b>Construct</b>  | <b>Element (seven-point Likert scale)</b>                                                                                                                                                                                                                                                                                                                                                                                                                                                                                                                              |
|-------------------|------------------------------------------------------------------------------------------------------------------------------------------------------------------------------------------------------------------------------------------------------------------------------------------------------------------------------------------------------------------------------------------------------------------------------------------------------------------------------------------------------------------------------------------------------------------------|
| Product knowledge | <p><b>PK1:</b> I am familiar with the performance and features of a remanufactured gearbox compared to that of new.</p> <p><b>PK2:</b> I am familiar with quality of remanufactured compared to that of new.</p> <p><b>PK3:</b> I am familiar with the differences between a remanufactured and a re-used gearbox.</p> <p><b>PK4:</b> I am familiar with the price level of remanufactured compared to that of a new gearbox</p>                                                                                                                                       |
| Perceived benefit | <p><b>PB1:</b> Purchasing remanufactured instead of new can result in lower purchasing costs.</p> <p><b>PB2:</b> Purchasing remanufactured instead of new can lead to resource and energy savings.</p> <p><b>PB3:</b> Purchasing remanufactured instead of new can reduce the adverse effects on the environment.</p>                                                                                                                                                                                                                                                  |
| Perceived risk    | <p><b>PR1:</b> The quality and the safety of remanufactured is not as good as that of new products, so remanufactured may pose a higher safety risk (physical risk).</p> <p><b>PR2:</b> Remanufactured gearbox does not perform and function as well as a new product, so remanufactured may pose a higher performance risk (performance risk).</p> <p><b>PR3:</b> Purchasing remanufactured may not be a good investment (financial risk).</p> <p><b>PR4:</b> I may have to return to the garage for repairs more frequently if I use remanufactured (time risk).</p> |
